# Supplementary material
Source: Elsevier journal article supplement (https://www.youngevity.net/images/pdf/MineralMakeup/mmc1.pdf)
Supplement: mmc1 [file mmc1.pdf]

Foundations

**CHARMING™**

A light pink shade for light-medium skin tones.

Ingredients: Mica, titanium dioxide, iron oxides, ultramarine blue. May also contain zinc oxide.

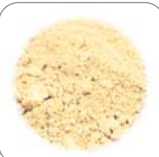

Item# 161008 - 6 g

**SOPHISTICATED™**

A pink undertone shade created for the very lightest of complexions.

Ingredients: Mica, titanium dioxide, iron oxides, ultramarine blue. May also contain zinc oxide.

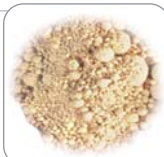

Item# 161000 - 6 g

**SENSUAL™**

A neutral shade for light complexions.

Ingredients: Mica, titanium dioxide, iron oxides, ultramarine blue. May also contain zinc oxide.

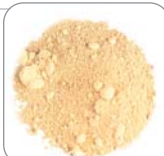

Item# 161001 - 6 g

**BEAUTIFUL™**

A classic neutral shade for medium-light complexions.

Ingredients: Mica, titanium dioxide, iron oxides, ultramarine blue. May also contain zinc oxide.

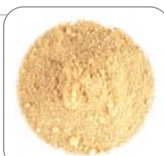

Item# 161002 - 6 g

**GLAMOROUS™**

Perfect for most Caucasians who maintain a tan, this foundation has a warm bronze base with complementing red tones.

Ingredients: Mica, titanium dioxide, iron oxides, ultramarine blue. May also contain zinc oxide.

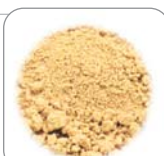

Item# 161009 - 6 g

**GORGEOUS™**

A medium-dark tone for Latin, Indian, African-American, Filipino, and Southeast Asian women that have some pink tones in their skin.

Ingredients: Mica, titanium dioxide, iron oxides, ultramarine blue. May also contain zinc oxide.

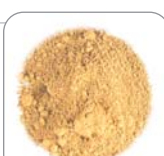

Item# 161004 - 6 g

LIGHT TO MEDIUM TONES
